# Supplementary material for: Discrete logic modelling as a means to link protein signalling networks with functional analysis of mammalian signal transduction
Source: PubMed Central journal article supplement — Mol Syst Biol. 2009 Dec 1;5:331. doi: 10.1038/msb.2009.87 (PMC2824489; doi:10.1038/msb.2009.87), 2009-12-01
Supplement: msb200987-s2.pdf [file msb200987-s2.pdf]

## SUPPLEMENTARY INFO

**Table S1. List of species used in the model of liver signaling and their abbreviations.** The type column marks the designated variables as either extracellular stimuli (S), targets of the small molecule inhibitors (I), or signal readouts (R).

| species abbr.  | Species full Name                                                                                    | Type |
|----------------|------------------------------------------------------------------------------------------------------|------|
| il6            | interleukin 6                                                                                        | S    |
| il6r           | interleukin 6 receptor                                                                               |      |
| jak1           | Janus Kinase 1                                                                                       |      |
| jak2           | Janus Kinase 2                                                                                       |      |
| stat1          | Signal transducer and activator of transcription 1                                                   |      |
| stat3          | Signal transducer and activator of transcription 3                                                   | R    |
| stat33         | homodimer (STAT3,STAT3)                                                                              |      |
| stat13         | heterodimer (STAT1,STAT3)                                                                            |      |
| stat11         | homodimer (STAT1,STAT1)                                                                              |      |
| stat3n         | nuclear translocation of STAT33                                                                      |      |
| stat1n         | nuclear translocation of STAT11                                                                      |      |
| ifn $\gamma$   | interferon gamma                                                                                     | S    |
| ifn $\gamma$ r | interferon gamma receptor                                                                            |      |
| tgfa           | transforming growth factor alpha                                                                     | S    |
| egfr           | epidermal growth factor alpha                                                                        |      |
| igf1           | insulin growth factor 1                                                                              | S    |
| igfr           | insulin growth factor 1 receptor                                                                     |      |
| tnf            | tumor necrosis factor alpha                                                                          | S    |
| tnfr           | tumor necrosis factor receptor                                                                       |      |
| il1 $\alpha$   | interleukin 1 alpha                                                                                  | S    |
| il1r           | interleukin 1 receptor                                                                               |      |
| lps            | Lipopolysaccharide                                                                                   | S    |
| tlr4           | Toll-like Receptor 4                                                                                 |      |
| rasgap         | Ras GTPase activating protein                                                                        |      |
| grb2           | Growth factor receptor-bound protein 2                                                               |      |
| shc            | (Src homology 2 domain containing) transforming protein                                              |      |
| sos            | Son of sevenless                                                                                     |      |
| ras            | rat sarcoma                                                                                          |      |
| raf1           | (MAP3K)                                                                                              |      |
| rac            | serine/threonine protein kinase ?                                                                    |      |
| pak            | p21-activated kinase                                                                                 |      |
| pi3k           | Phosphoinositide 3-kinase                                                                            | I    |
| irs1_t         | insulin receptor substrate protein / Tyrosine phosphorylation of IRS1 (Insulin receptor substrate 1) |      |
| irs1_s         | insulin receptor substrate protein / Serine phosphorylation of IRS1 (Insulin receptor substrate 1)   | R    |
| a20            | inhibitor of NF-kappa B                                                                              |      |
| pip2           | phosphatidylinositol biphosphate                                                                     |      |
| pip3           | phosphatidylinositol 3,4,5-trisphosphate                                                             |      |
| pp2a           | Protein phosphatase 2                                                                                |      |
| pdk1           | Pyruvate dehydrogenase kinase, isozyme 1                                                             |      |
| akt            | V-akt murine thymoma viral oncogene homolog                                                          | R    |

|         |                                                                                                |     |
|---------|------------------------------------------------------------------------------------------------|-----|
| cas9    | caspase 9                                                                                      |     |
| traf6   | TNF receptor associated factor 6                                                               |     |
| traf2   | TNF receptor associated factor 2                                                               |     |
| sitpec  | Evolutionarily conserved signaling intermediate in Toll pathway                                |     |
| ask1    | Apoptosis signal-regulating kinase 1                                                           |     |
| nik1    | Nim1-like kinase 1                                                                             |     |
| map3k7  | MAP (mitogen-activated protein) kinase kinase kinase 7                                         |     |
| map3k1  | MAP (mitogen-activated protein) kinase kinase kinase 1                                         |     |
| mek     | Mitogen activated protein kinase kinase 1 / Antibody recognizes both MEK1 and MEK2             | R/I |
| mkk7    | mitogen-activated protein kinase kinase 7                                                      |     |
| mkk4    | mitogen-activated protein kinase kinase 4                                                      |     |
| mkk6    | mitogen-activated protein kinase kinase 6                                                      |     |
| mkk3    | mitogen-activated protein kinase kinase 3                                                      |     |
| erk     | extracellular signal-regulated kinase-1 / heterodimer (ERK1,ERK2)                              | R   |
| erkn    | extracellular signal-regulated kinase-1/ Nuclear translocation of heterodimer ERK1 & ERK2      |     |
| jnk     | Jun N-terminal kinase / heterodimer (JNK1, JNK2)                                               | R   |
| jnk     | Jun N-terminal kinase / Nuclear translocation of heterodimer JNK1 & JNK2                       |     |
| p38     | p38 mitogen-activated protein kinase                                                           | R/I |
| p38n    | nuclear translocation of P38                                                                   |     |
| prak    | p38 regulated/activated protein kinase                                                         |     |
| hsp27   | Heat Shock Protein 27                                                                          | R   |
| p70s6   | Phospho-p70 S6 Kinase                                                                          | R   |
| p90rsk  | p90 ribosomal S6 kinase                                                                        | R   |
| p90rskn | p90 ribosomal S6 kinase / Nuclear translocation of P90RSK                                      |     |
| ikk     | I $\kappa$ B kinase                                                                            | I   |
| cot     | Cancer osaka thyroid (kinase)                                                                  |     |
| mtor    | mammalian Target of Rapamycin                                                                  | I   |
| ikb     | nuclear factor of kappa light polypeptide gene enhancer in B-cells inhibitor                   | R   |
| nfkB    | nuclear factor kappa-light-chain-enhancer of activated B cells                                 |     |
| nfkbn   | nuclear factor kappa-light-chain-enhancer of activated B cells / Nuclear translocation of NFKB |     |
| gsk3    | Glycogen synthase kinase 3                                                                     | R/I |
| mdm2    | murine double minute 2                                                                         |     |
| ck2     | casein kinase 2                                                                                |     |
| p53     | tumor protein 53                                                                               | R   |
| atf2    | Activating transcription factor-2                                                              |     |
| cjun    | N-terminal kinase (JNK)                                                                        | R   |
| msk12   | heterodimer (MSK1,MSK2), mitogen- and stress-activated <i>protein</i> kinase                   |     |
| creb    | cAMP response element binding                                                                  | R   |
| atf1    | activating transcription factor 1                                                              |     |
| hist h3 | Histone H3                                                                                     | R   |
| elk1    | (member of ETS oncogene family)                                                                |     |
| cfos    | cFos protein                                                                                   |     |
